# Supplementary material
Source: PubMed Central journal article supplement (PMC2717612)
Supplement: NIHMS115101-supplement-01.pdf [file NIHMS115101-supplement-01.pdf]

Appendix

**PERCEPTIONS REGARDING INVESTIGATIONAL SCREENING FOR MEMORY IN  
PRIMARY CARE**

Please choose one answer to each of the following questions.

**A. PRIOR EXPERIENCE WITH ALZHEIMER'S DISEASE**

1. Do any relatives or close friends of yours have or have they had Alzheimer's disease?  
 Yes                                       No
  
2. Do you believe that you are at higher risk of getting Alzheimer's disease than other people in your age group?  
 Yes                                       No
  
3. Do you think that you have more problems with memory than others your age?  
 Yes                                       No
  
4. Have you ever been told by your doctor that you have a problem with your memory?  
 Yes                                       No
  
5. Are you taking any medications to help with your memory?  
 Yes                                       No

Please let me know if you agree or disagree with the following statements.

**B. ACCEPTANCE OF SCREENING FOR ALZHEIMER'S DISEASE**

6. I would like to know if I am at higher risk than others for developing Alzheimer's disease.

Strongly agree    Agree    I don't know    Disagree    Strongly disagree

7. I would like to know if I have Alzheimer's disease.

Strongly agree    Agree    I don't know    Disagree    Strongly disagree

8. I would like to know if I have a problem with memory.

Strongly agree    Agree    I don't know    Disagree    Strongly disagree

9. I would like to be tested for the presence of Alzheimer's disease on a regular basis with a short questionnaire.

Strongly agree    Agree    I don't know    Disagree    Strongly disagree

10. I would like to be tested for the presence of Alzheimer's disease on a regular basis with a blood sample.

Strongly agree    Agree    I don't know    Disagree    Strongly disagree

11. I would like to be tested for the presence of Alzheimer's disease on a regular basis with pictures of my head or brain (CT-scan or MRI).

Strongly agree    Agree    I don't know    Disagree    Strongly disagree

12. I would like a doctor to examine me every year to know if I have developed memory problems.

Strongly agree    Agree    I don't know    Disagree    Strongly disagree

13. I would like a doctor to examine me every year to know if I have developed Alzheimer's disease.

Strongly agree    Agree    I don't know    Disagree    Strongly disagree

### **C. ACCEPTANCE OF SCREENING FOR OTHER CONDITIONS**

14. I would like a doctor to examine me every year to know if I have developed colon cancer.  
 Strongly agree  Agree  I don't know  Disagree  Strongly disagree
15. I would like a doctor to examine me every year to know if I have developed depression.  
 Strongly agree  Agree  I don't know  Disagree  Strongly disagree

#### **D. ATTITUDES ABOUT ALZHEIMER'S DISEASE**

16. I do not believe that treatment for Alzheimer's disease is currently available.  
 Strongly agree  Agree  I don't know  Disagree  Strongly disagree
17. I believe that early detection of Alzheimer's disease increases the chance to treat the disease better.  
 Strongly agree  Agree  I don't know  Disagree  Strongly disagree
18. If I had Alzheimer's disease, my family would suffer financially.  
 Strongly agree  Agree  I don't know  Disagree  Strongly disagree
19. If I had Alzheimer's disease, my family would suffer emotionally.  
 Strongly agree  Agree  I don't know  Disagree  Strongly disagree
20. If I knew that I had Alzheimer's disease earlier, my family would have a better chance to take care of me.  
 Strongly agree  Agree  I don't know  Disagree  Strongly disagree
21. If I had Alzheimer's disease, I would not want my family to know.  
 Strongly agree  Agree  I don't know  Disagree  Strongly disagree
22. If I had Alzheimer's disease, I would feel humiliated by my family members and/or

others who would treat me poorly or laugh at me.

Strongly agree  Agree  I don't know  Disagree  Strongly disagree

23. If I had Alzheimer's disease, I would no longer be taken seriously.

Strongly agree  Agree  I don't know  Disagree  Strongly disagree

24. If I had Alzheimer's disease, I would be considered stupid and unable to do things.

Strongly agree  Agree  I don't know  Disagree  Strongly disagree

25. If I knew that I had Alzheimer's disease, I would be ashamed or embarrassed.

Strongly agree  Agree  I don't know  Disagree  Strongly disagree

26. If I knew that I had Alzheimer's disease, I would be depressed.

Strongly agree  Agree  I don't know  Disagree  Strongly disagree

27. If I knew that I had Alzheimer's disease, I would be anxious.

Strongly agree  Agree  I don't know  Disagree  Strongly disagree

28. If I knew that I had Alzheimer's disease, I would give up on life.

Strongly agree  Agree  I don't know  Disagree  Strongly disagree

29. If I found out early that I had Alzheimer's disease, I would have more time to plan my future.

Strongly agree  Agree  I don't know  Disagree  Strongly disagree

30. If I found out early that I had Alzheimer's disease, I would have more time to talk with my family about my health care.

Strongly agree  Agree  I don't know  Disagree  Strongly disagree

31. If I found out early that I had Alzheimer's disease, I would have more time to talk with my family about my finances.
- Strongly agree    Agree    I don't know    Disagree    Strongly disagree
32. If I found out early that I had Alzheimer's disease, I would sign my advance directive or my living-will.
- Strongly agree    Agree    I don't know    Disagree    Strongly disagree
33. If I had Alzheimer's disease, my doctor would not provide the best care for my other medical problems.
- Strongly agree    Agree    I don't know    Disagree    Strongly disagree
34. If I knew that I had Alzheimer's disease earlier, I would be motivated to have a healthier lifestyle.
- Strongly agree    Agree    I don't know    Disagree    Strongly disagree
35. If I had Alzheimer's disease, my doctor and other health professionals would not listen to me.
- Strongly agree    Agree    I don't know    Disagree    Strongly disagree
36. If I knew that I had Alzheimer's disease earlier, I would be more willing to participate in research about this disease.
- Strongly agree    Agree    I don't know    Disagree    Strongly disagree
37. If I had Alzheimer's disease, I would not be able to get health insurance.
- Strongly agree    Agree    I don't know    Disagree    Strongly disagree
38. If I had Alzheimer's disease, I would be concerned that my health insurance company would find out.

Strongly agree    Agree    I don't know    Disagree    Strongly disagree

39. If I had Alzheimer's disease, I would be concerned that my employer would find out.

Strongly agree    Agree    I don't know    Disagree    Strongly disagree

40. If I had Alzheimer's disease, I would not be able to get life insurance.

Strongly agree    Agree    I don't know    Disagree    Strongly disagree

41. If I had Alzheimer's disease, I would not be able to get long-term care insurance.

Strongly agree    Agree    I don't know    Disagree    Strongly disagree

42. If I had Alzheimer's disease, I would lose my home.

Strongly agree    Agree    I don't know    Disagree    Strongly disagree

43. If I had Alzheimer's disease, I would be living in a nursing home.

Strongly agree    Agree    I don't know    Disagree    Strongly disagree

44. If I had Alzheimer's disease, I would lose my driver's license and other privileges.

Strongly agree    Agree    I don't know    Disagree    Strongly disagree

## **E. OTHER COMMENTS**

45. What other concerns do you have about having Alzheimer's disease? (Please specify)

---

46. Did you feel comfortable answering these questions?

Yes                       No
